# Supplementary material for: Cr(III) Complexes Bearing a β-Ketoimine Ligand for Olefin Polymerization: Are There Differences between Coordinative and Covalent Bonding?
Source: MDPI journal article supplement (doi:10.3390/catal12020119), 2022-01-19
Supplement: s1 [file s1]

# Cr(III) Complexes Bearing a $\beta$ -Ketoimine Ligand for Olefin Polymerization: Are There Differences between Coordinative and Covalent Bonding?

Alessia Amodio <sup>1</sup>, Giorgia Zanchin <sup>2\*</sup>, Fabio De Stefano <sup>3</sup>, Alessandro Piovano <sup>1</sup>, Benedetta Palucci <sup>2</sup>, Virginia Guiotto <sup>1</sup>, Rocco Di Girolamo <sup>3</sup>, Giuseppe Leone <sup>2</sup> and Elena Groppo <sup>1</sup>

<sup>1</sup> Dipartimento di Chimica, NIS Interdepartmental Research Center and INSTM Reference Center, Università degli Studi di Torino, I-10135 Torino, Italy; alessia.amodio@unito.it (A.A.); alessandro.piovano@unito.it (A.P.); virginia.guiotto@edu.unito.it (V.G.); elena.groppo@unito.it (E.G.)

<sup>2</sup> Consiglio Nazionale delle Ricerche, Istituto di Scienze e Tecnologie Chimiche “Giulio Natta” (SCITEC), I-20133 Milano, Italy; benedetta.palucci@scitec.cnr.it (B.P.); giuseppe.leone@scitec.cnr.it (G.L.)

<sup>3</sup> Dipartimento di Scienze Chimiche, Università di Napoli “Federico II”, Complesso Monte S. Angelo, I-80126 Napoli, Italy; fabio.destefano@unina.it (F.D.S.); rocco.digirolamo@unina.it (R.D.G.)

\* Correspondence: giorgia.zanchin@scitec.cnr.it

## SUPPORTING INFORMATION

### Table of contents

**Figure S1:** <sup>1</sup>H-NMR spectrum of ligand L.

**Table S1:** Polymerization of ethylene

**Figure S2:** X-ray powder diffraction profiles of PE samples.

**Figure S3:** IR of poly(norbornene).

**Figure S4:** IR of poly(diciclopentadiene) and poly(5-ethylidene-2-norbornene).

**Figure S5:** <sup>1</sup>H and <sup>13</sup>C-NMR of poly(diciclopentadiene).

**Figure S6:** <sup>1</sup>H and <sup>13</sup>C-NMR of poly(5-ethylidene-2-norbornene).

**Figure S7:** TGA curves of the poly(norbornene) samples.

**Figure S8:** IR of poly(norbornadiene).

**Figure S9:** TGA curves of the poly(diciclopentadiene) and poly(norbornadiene) samples.

**Scheme S1:** polymerization of norbornadiene, mechanistic pathway.

**Figure S10:** Evolution of the UV-Vis spectra of complexes **1** and **2** in the presence of TEAL.

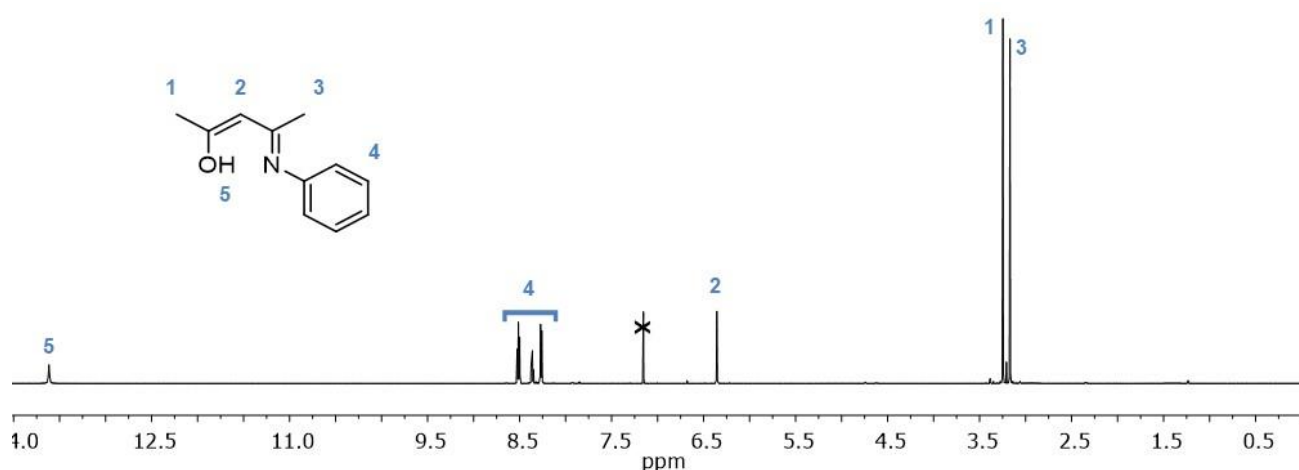Figure S1. <sup>1</sup>H-NMR spectrum of ligand L.Table S1. Polymerization of ethylene<sup>a</sup>.

| entry           | complex | co-cat               | Al/Cr | T    | time  | yield | act <sup>b</sup> | T <sub>m</sub> <sup>c</sup> | T <sub>c</sub> <sup>c</sup> | ΔH <sub>m</sub> <sup>c</sup> | M <sub>w</sub> <sup>d</sup> | M <sub>n</sub> <sup>d</sup> | M <sub>w</sub> /M <sub>n</sub> <sup>d</sup> |
|-----------------|---------|----------------------|-------|------|-------|-------|------------------|-----------------------------|-----------------------------|------------------------------|-----------------------------|-----------------------------|---------------------------------------------|
|                 |         |                      |       | (°C) | (min) | (mg)  |                  | (°C)                        | (°C)                        | (J g <sup>-1</sup> )         | (g mol <sup>-1</sup> )      | (g mol <sup>-1</sup> )      |                                             |
| 9               | 1       | MAO                  | 250   | 20   | 24    | 42    | 11               | 134.9                       | 113.3                       | 199.7                        | 519500                      | 66000                       | 7.9                                         |
| 10              | 1       | Et <sub>3</sub> Al   | 250   | 20   | 8     | 0     | 0                |                             |                             |                              |                             |                             |                                             |
| 11              | 1       | Et <sub>2</sub> AlCl | 250   | 20   | 12    | 52    | 26               | 135.7                       | 115.8                       | 198.6                        | 769900                      | 126000                      | 6.1                                         |
| 12              | 1       | dMAO <sup>e</sup>    | 250   | 20   | 11    | 91    | 50               | 136.2                       | 116.7                       | 198.3                        |                             |                             |                                             |
| 13              | 1       | Et <sub>2</sub> AlCl | 50    | 20   | 10    | 87    | 52               | 137.5                       | 114.6                       | 184.2                        |                             | <i>n.a.</i>                 |                                             |
| 14              | 1       | dMAO <sup>e</sup>    | 50    | 20   | 11    | 0     | 0                |                             |                             |                              |                             |                             |                                             |
| 15 <sup>#</sup> | 1       | Et <sub>2</sub> AlCl | 50    | 20   | 10    | 32    | 19               | 132.2                       | 115.7                       | 182.2                        | 1138600                     | 120300                      | 9.5                                         |
| 16              | 1       | Et <sub>2</sub> AlCl | 50    | 50   | 7     | 8     | 7                |                             |                             |                              |                             |                             |                                             |
| 17              | 2       | MAO                  | 250   | 20   | 5     | 27    | 32               |                             |                             |                              |                             |                             |                                             |
| 18              | 2       | Et <sub>2</sub> AlCl | 250   | 20   | 5     | 3     | 4                |                             |                             |                              |                             |                             |                                             |

<sup>a</sup> polymerization conditions: ethylene pressure, 1.01 bar; total volume, 25 mL (toluene); Cr complex, 10 μmol, complex solution in dry toluene; <sup>b</sup> activity in kg<sub>pol</sub> mol<sub>Cr</sub><sup>-1</sup> h<sup>-1</sup>; <sup>c</sup> determined by DSC; <sup>c</sup> crystallinity degree calculated from DSC; <sup>d</sup> determined by SEC; <sup>e</sup> dMAO was prepared removing toluene and free AlMe<sub>3</sub> from commercially available MAO. <sup>#</sup> reaction performed in dry dichloromethane.

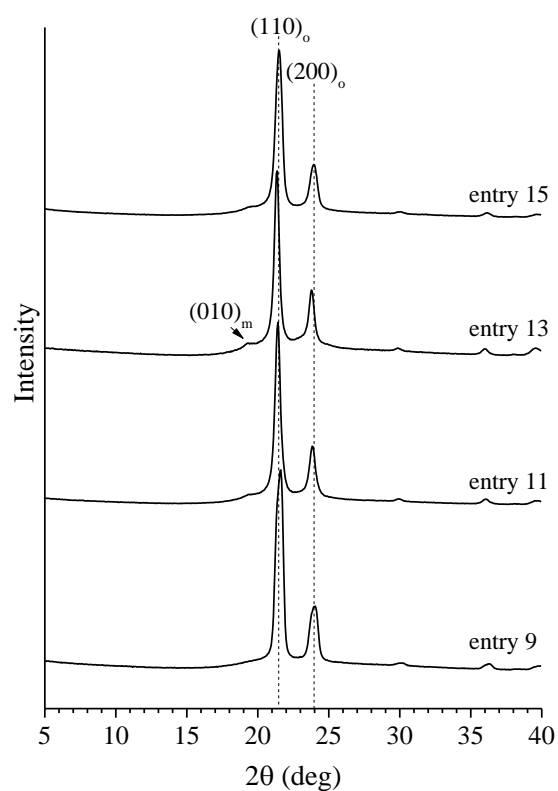

**Figure S2.** X-ray powder diffraction profiles of some of the PE samples reported in Table S1.

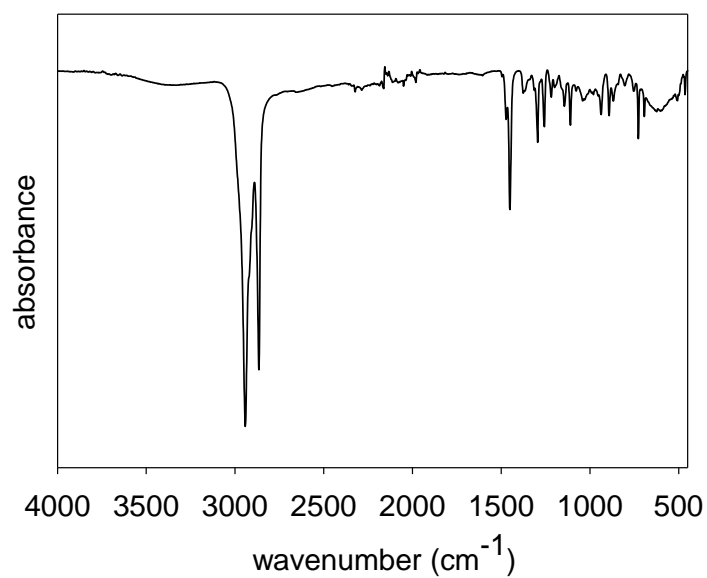

**Figure S3.** IR of poly(norbornene) (Table 1, entry 4).

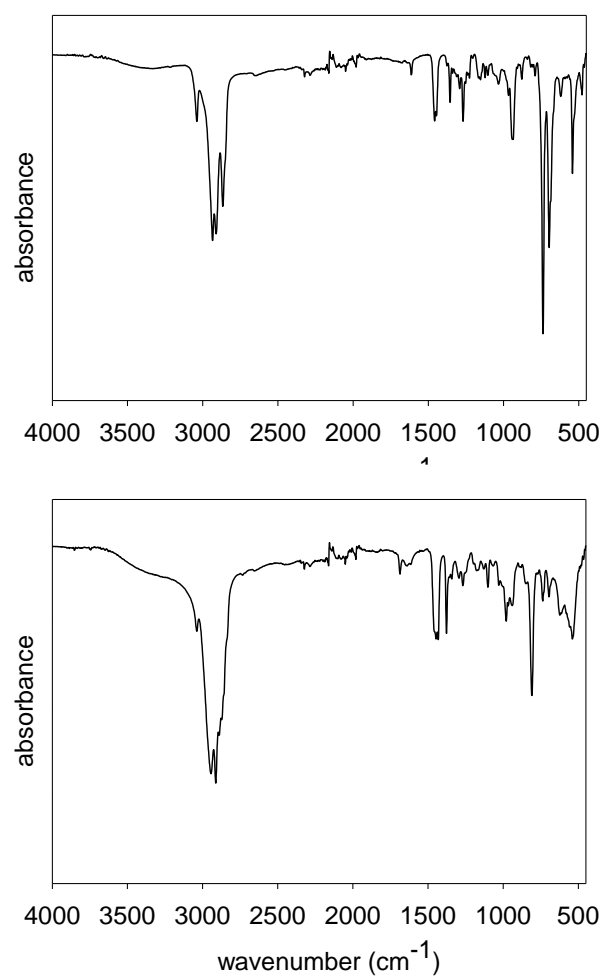

**Figure S4.** IR of poly(dicyclopentadiene) (*left*) and poly(5-ethylidene-2-norbornene) (*right*) (Table 1, entries 6 and 7, respectively).

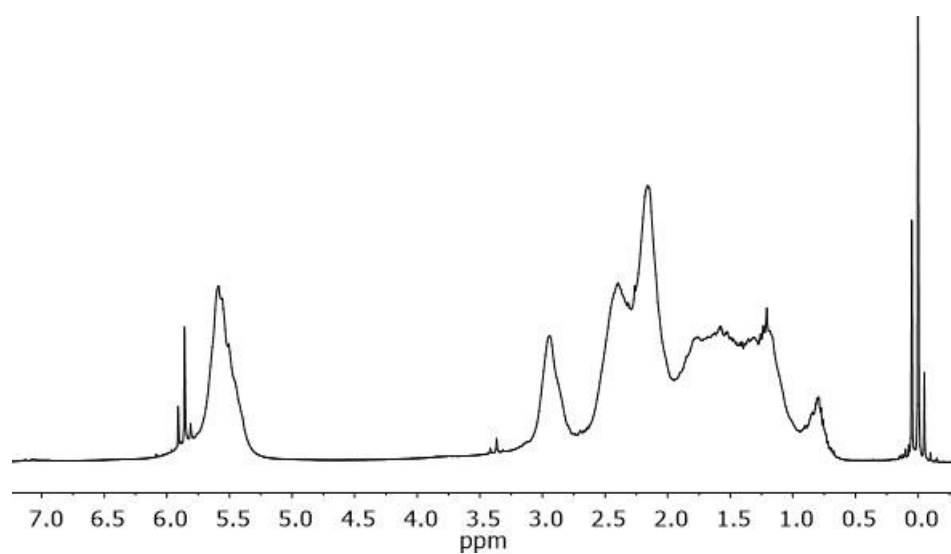

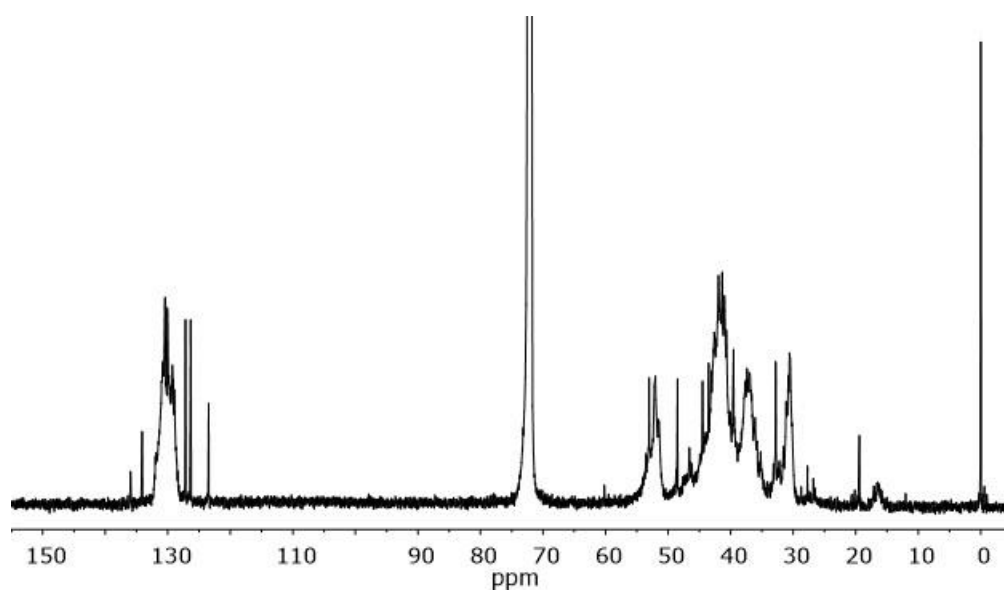

**Figure S5.**  $^1\text{H}$  (top) and  $^{13}\text{C}$  (bottom) NMR of poly(dicyclopentadiene) (Table 1, entry 6).

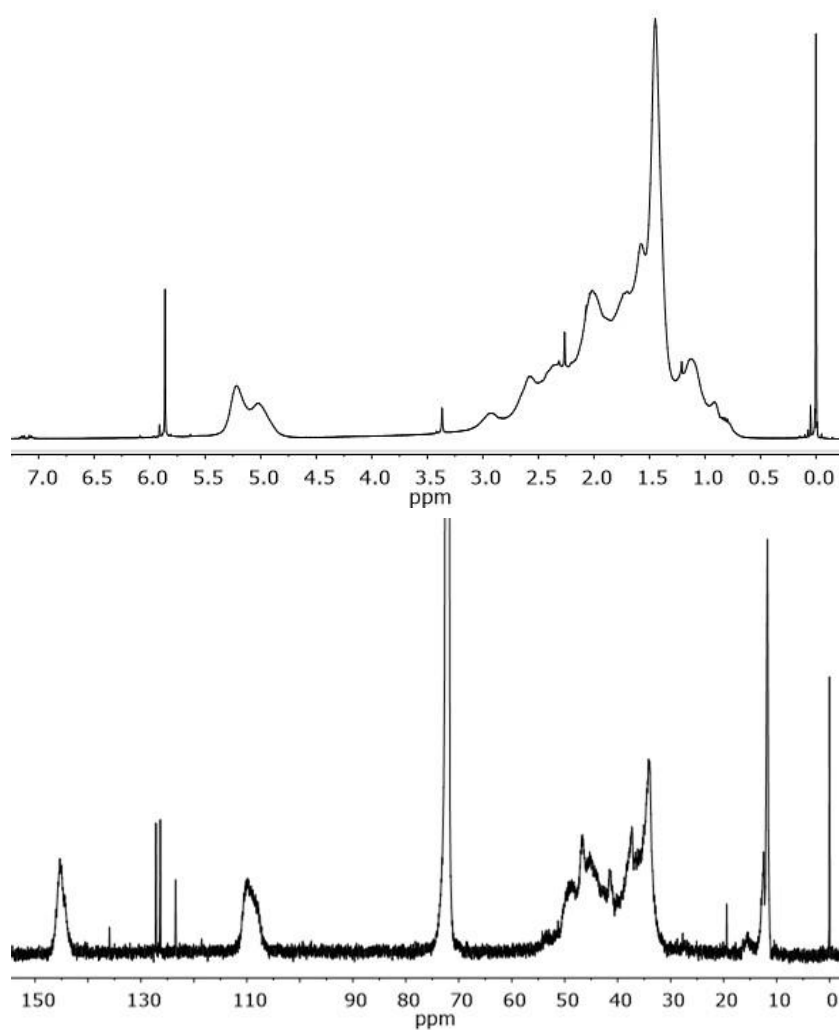

**Figure S6.**  $^1\text{H}$  (top) and  $^{13}\text{C}$  (bottom) NMR of poly(5-ethylidene-2-norbornene) (Table 1, entry 7).

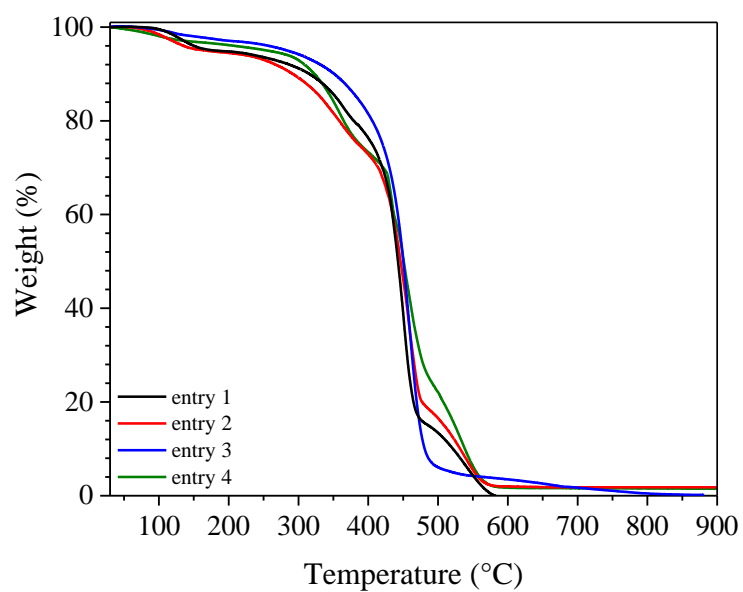

**Figure S7.** TGA curves of the as-prepared NB oligomer samples reported in Table 1 acquired under a flowing N<sub>2</sub> atmosphere by heating the sample at 10 °C min<sup>-1</sup>.

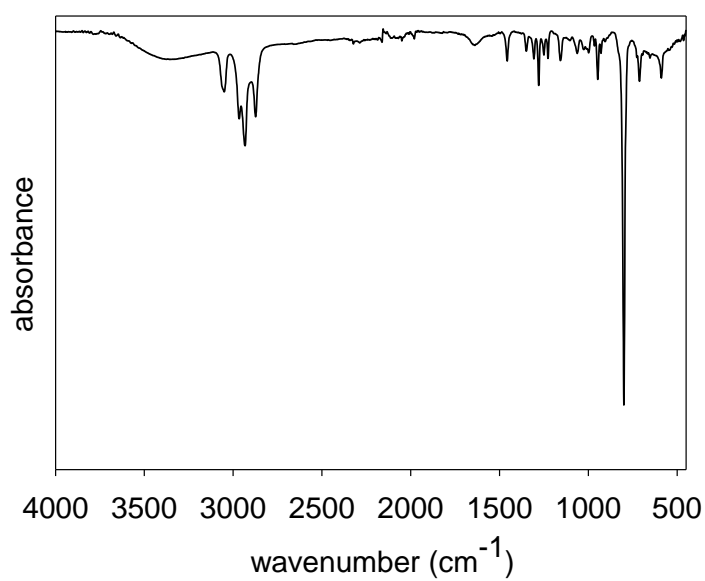

**Figure S8.** IR of poly(norbornadiene) (Table 2, entry 8).

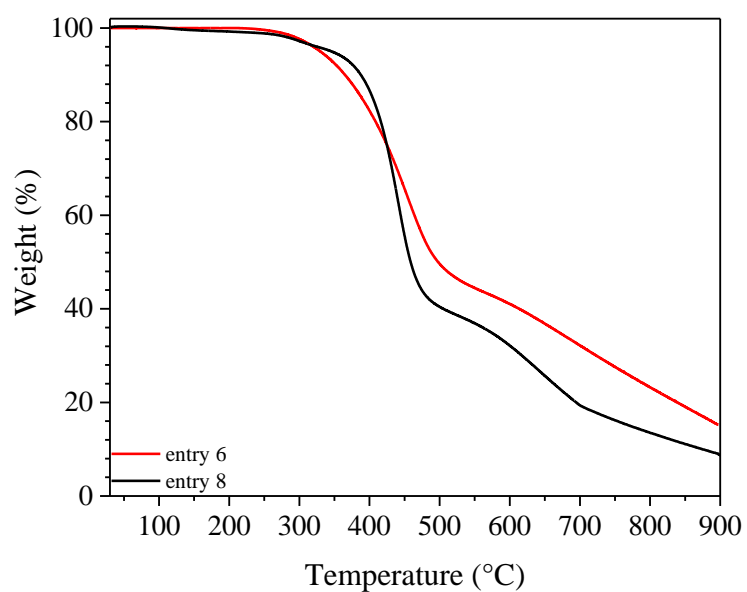

**Figure S9.** TGA curves of samples 6 and 8 reported in Table 1 acquired under a flowing N<sub>2</sub> atmosphere by heating the sample at 10 °C min<sup>−1</sup>.

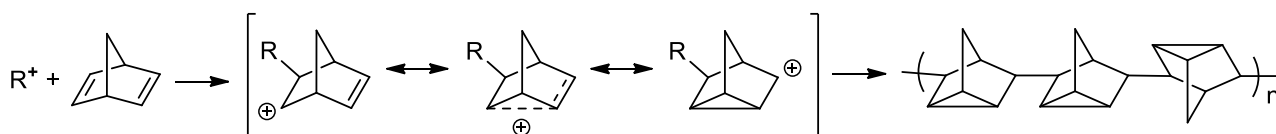

**Scheme S1.** The possible cationic mechanism involved in the polymerization of NBD.

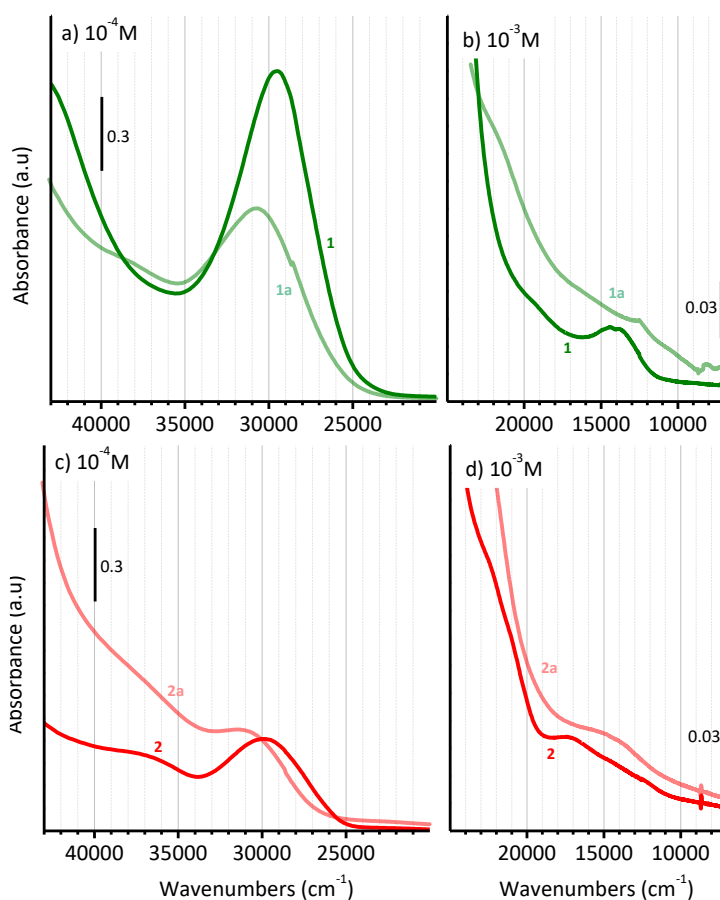

**Figure S10.** Evolution of the UV-Vis spectra of complex **1** (parts a and b) and complex **2** (parts c and d) in the presence of TEAL (10  $\mu$ l) in the region of intra-ligand  $\pi$ - $\pi^*$  transitions (parts a and c) and in the region of d-d transitions (parts b and d). The spectra have been collected in chloroform at the concentration of  $10^{-4}$  M (part a and c) and  $10^{-3}$  M (part b and d), respectively.

After the addition of 10  $\mu$ l of TEAL to complex **1**, relevant changes are observed in the UV-Vis spectrum, both in the region of intra-ligand  $\pi$ - $\pi^*$  transitions (Figure S10a) and in the region of d-d transitions (Figure S10b). In the former region, the main  $\pi$ - $\pi^*$  transition decrease in intensity and shifts at higher energy, accompanied by the appearance of a band at about  $37000\text{ cm}^{-1}$ . A band at a similar position is also present in the spectrum of complex **2** (spectrum **2** in Figure S10c) and it was assigned to a ligand-to-metal charge-transfer transition of the type  $\text{O} \rightarrow \text{Cr}$ , diagnostic for the presence of a covalent bond between Cr and O. Therefore, observation of this band in spectrum **1a** confirms that TEAL is able to reduce the ligand **L** in complex **1**, promoting the formation of a covalent Cr-O bond. In the region of d-d transitions (Figure S10b), the bands observed in spectrum **1** are both split in two components in spectrum **1a**, which is very much similar to the spectrum of complex **2** (spectrum **2** in Figure S10d).

Addition of 10  $\mu$ l of TEAL to complex **2** causes much less changes in the UV-Vis spectrum in both regions. In the region of intra-ligand  $\pi$ - $\pi^*$  transitions (Figure S10c) a shift of the main  $\pi$ - $\pi^*$  transition at higher energy is observed, while in the region of d-d transitions the spectrum becomes slightly broader. Both changes are compatible with the exchange of a chlorine atom with an alkyl group in the coordination sphere of the chromium center.
